# Supplementary material for: Ambra1 Shapes Hippocampal Inhibition/Excitation Balance: Role in Neurodevelopmental Disorders
Source: PubMed Central journal article supplement (PMC6132777; doi:10.1007/s12035-018-0911-5), 2018-02-27
Supplement: 12035_2018_911_MOESM1_ESM.pdf [file 12035_2018_911_MOESM1_ESM.pdf]

1 **SUPPLEMENTARY INFORMATION**

2

3

4 **Ambra1 shapes hippocampal inhibition/excitation balance: role in neurodevelopmental**  
5 **disorders**

6

7 **Molecular Neurobiology**

8

9 Annalisa Nobili<sup>#</sup>, Paraskevi Krashia<sup>#</sup>, Alberto Cordella, Maria Concetta Dell'Acqua, Angela Caruso,  
10 Annabella Pignataro, Ramona Marino, Francesca Sciarra, Livia La Barbera, Filippo Biamonte, Maria  
11 Luisa Scattoni, Martine Ammassari-Teule, Francesco Cecconi, Nicola Berretta, Flavio Keller, Nicola  
12 Biagio Mercuri, Marcello D'Amelio\*

13

14 **Contact Information:**

15 \*Corresponding author: m.damelio@unicampus.it

16

17

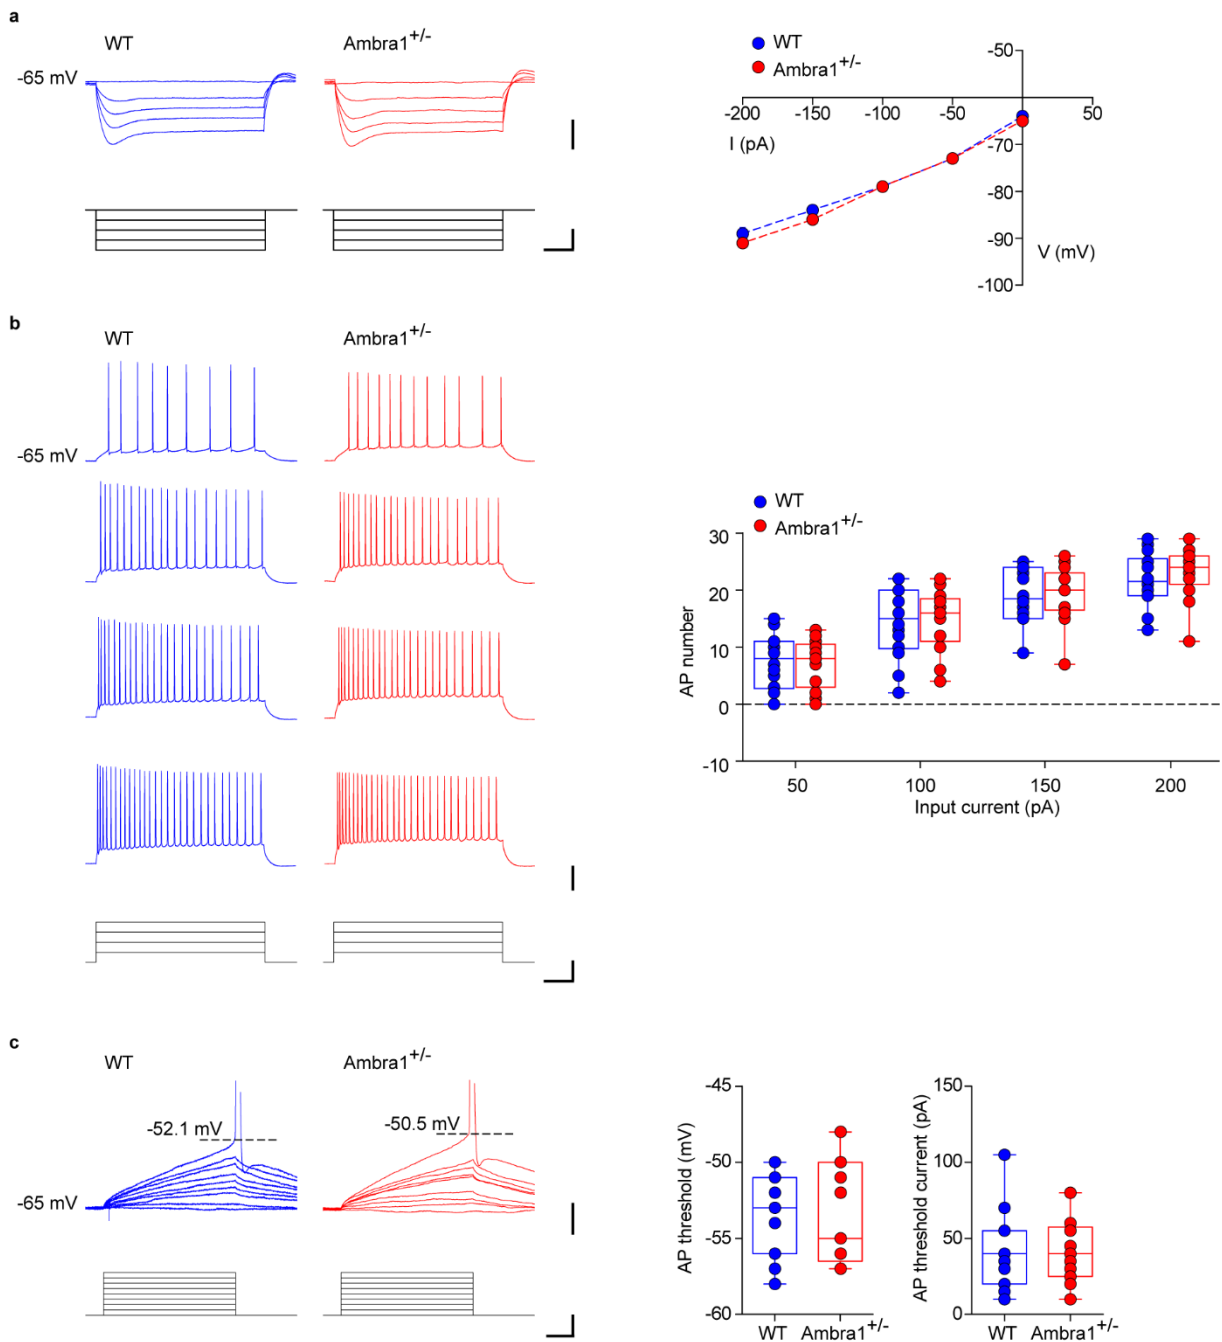

18

19 **Suppl Fig 1: The excitability of CA1 pyramidal neurons is not altered in *Ambra1*<sup>+/-</sup> female**

20 **mice**

21 (A) Representative sub-threshold responses (at 50 pA stepped current injections; 600 ms protocols

22 are shown below; scale bars: 100 ms, 15 mV top, 100 pA bottom) from a female WT and *Ambra1*<sup>+/-</sup>

23 CA1 pyramidal neuron and mean I/V plots ( $\pm$  sem). The mean  $R_{in}$  does not differ between WT and

24 *Ambra1*<sup>+/-</sup> mice (n = 15 WT and 13 *Ambra1*<sup>+/-</sup> neurons; 3 WT and 4 *Ambra1*<sup>+/-</sup> mice). (B) Example

25 action potential (AP) firing patterns from the same neurons as in (A), in response to 50 pA-stepped

26 depolarizing current injections (50, 100, 150 and 200 pA current injection, from top to bottom; scale  
27 bars: 100 ms, 25 mV top, 100 pA bottom). The AP number at different input currents does not differ  
28 between WT and *Ambra1*<sup>+/-</sup> mice (n = 15 WT and 13 *Ambra1*<sup>+/-</sup> neurons; 3 WT and 4 *Ambra1*<sup>+/-</sup>  
29 mice). (C) Example current-clamp recordings (scaled to show the AP threshold) and respective drive  
30 current (5 pA stepped current injections; 50 ms duration; scale bars: 10 ms, 5 mV top, 20 pA bottom)  
31 to induce AP firing in the CA1 pyramidal neurons shown in **A** and **B**. The AP threshold and drive  
32 current do not differ between WT and *Ambra1*<sup>+/-</sup> neurons (n = 15 WT and 13 *Ambra1*<sup>+/-</sup> neurons; 3  
33 WT and 4 *Ambra1*<sup>+/-</sup> mice).  
34

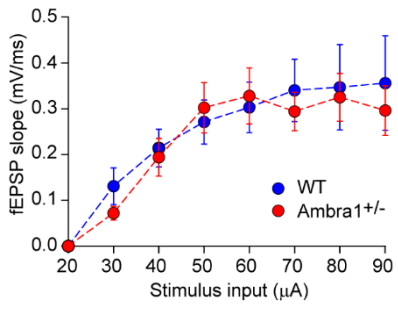

36 **Suppl Fig 2: Input/output curves of CA3-to-CA1 fEPSP slope in female mice**

37 Input/output curves of CA3-to-CA1 fEPSP mean slope ( $\pm$  sem) at stimulations of increasing intensity,  
38 showing no difference in basal synaptic transmission between WT and Ambra1<sup>+/-</sup> female mice (n =  
39 19 WT and 25 Ambra1<sup>+/-</sup> slices from 6 mice per genotype).

40

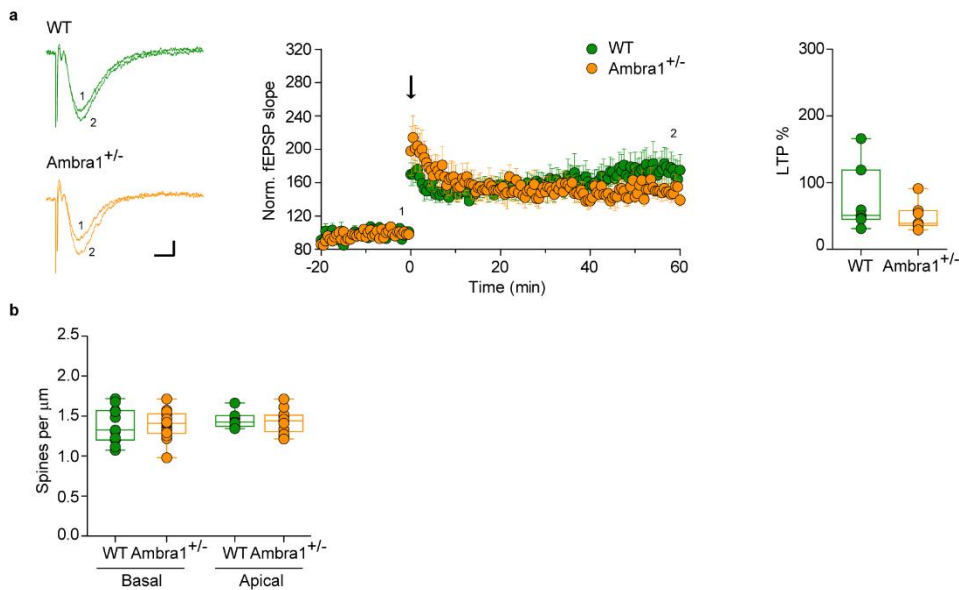

41

42 **Suppl Fig 3: The CA3-to-CA1 synaptic plasticity and spine density are unchanged in male**  
 43 **Ambra1<sup>+/-</sup> mice**

44 (A) Running plots of normalized CA3-to-CA1 fEPSP mean slope ( $\pm$  sem) recorded from the dendritic  
 45 region of CA1 pyramidal neurons in hippocampal slices from male WT and Ambra1<sup>+/-</sup> mice. The  
 46 arrow indicates the time when a high frequency conditioning train was delivered on the Schaffer  
 47 collaterals. The traces (scale bars: 5 ms, 0.1 mV) are superimposed fEPSPs recorded during baseline  
 48 (1) and 1 h after LTP induction (2). The box-and-whisker plot indicates the degree of potentiation,  
 49 measured as fEPSP slope increase from baseline, 55-60 min after the train (n = 7 slices from 3 mice  
 50 per genotype). (B) Spine density of basal and apical dendrites of CA1 pyramidal neurons in WT and  
 51 Ambra1<sup>+/-</sup> male mice, expressed as spine number per 1  $\mu\text{m}$  dendrite segment.

52

53 **Suppl Table 1: Summary of sub-threshold and supra-threshold membrane properties of CA1**  
 54 **pyramidal neurons.**

55  $R_{in}$ : input resistance;  $V_{rest}$ : resting membrane potential; AP: action potential; FWHM: full-width at

|                        | <b>WT (n = 15)</b> | <b>Ambra1<sup>+/-</sup> (n = 13)</b> | <b>Unpaired <i>t</i>-test <i>P</i> value</b> |
|------------------------|--------------------|--------------------------------------|----------------------------------------------|
| <b>Sub-threshold</b>   |                    |                                      |                                              |
| $R_{in}$ (M $\Omega$ ) | 122.94 $\pm$ 6.76  | 128.88 $\pm$ 3.84                    | 0.454                                        |
| $V_{rest}$ (mV)        | -63.73 $\pm$ 1.13  | -62.54 $\pm$ 0.58                    | 0.359                                        |
| Sag ratio              | 0.930 $\pm$ 0.02   | 0.928 $\pm$ 0.02                     | 0.838                                        |
| <b>Supra-threshold</b> |                    |                                      |                                              |
| AP Threshold (mV)      | -53.50 $\pm$ 0.64  | -53.63 $\pm$ 0.95                    | 0.912                                        |
| AP Amplitude (mV)      | 90.58 $\pm$ 3.57   | 92.54 $\pm$ 3.29                     | 0.691                                        |
| FWHM (msec)            | 1.19 $\pm$ 0.04    | 1.19 $\pm$ 0.05                      | 0.910                                        |
| AP Rise slope (dV/dt)  | 200.70 $\pm$ 17.10 | 209.28 $\pm$ 14.44                   | 0.705                                        |
| AP Decay slope (dV/dt) | 62.30 $\pm$ 5.55   | 59.15 $\pm$ 5.26                     | 0.684                                        |

56 half-maximum amplitude of action potential

57

58
